# Supplementary material for: Oligosaccharides fromAsparagus cochinchinensisfor ameliorating LPS-induced acute lung injury in mice
Source: Royal Society of Chemistry journal article supplement (doi:10.1039/d3fo05628g), 2024-01-01
Supplement: d3fo05628g1.pdf [file d3fo05628g1.pdf]

## **Supplementary Data**

### **Oligosaccharides from *Asparagus cochinchinensis* for ameliorating LPS-induced acute lung injury in mice**

Yajie Ma <sup>a</sup>, Fan Zhang <sup>a</sup>, Yujun Xie <sup>a</sup>, Luyao An <sup>a</sup>, Boli Zhang <sup>b\*</sup>, Boyang Yu <sup>a\*</sup> and Renshi Li <sup>a\*</sup>

#### **Author affiliations:**

<sup>a</sup> Jiangsu Provincial Key Laboratory for TCM Evaluation and Translational Development,  
School of Traditional Chinese Pharmacy, China Pharmaceutical University, Nanjing, Jiangsu  
Province, 211198, P.R. China

<sup>b</sup> State Key Laboratory of Modern Chinese Medicine, Tianjin University of Traditional  
Chinese Medicine, Tianjin, 301617, China

**Table S1. Raw samples of Asparagi Radix investigated in this work.**

| Sample No. | Source            | Sample no | Source               |
|------------|-------------------|-----------|----------------------|
| S1         | Tongren, Guizhou  | S11       | Linghai, Liaoning    |
| S2         | Kaili, Guizhou    | S12       | Guangzhou, Guangdong |
| S3         | Dafang, Guizhou   | S13       | Guizhou              |
| S4         | Sansui, Guizhou   | S14       | Emei, Sichuan        |
| S5         | Xingyi, Guizhou   | S15       | Chengdu, Sichuan     |
| S6         | Guizhou           | S16       | Hezhou, Guangxi      |
| S7         | Beijing           | S17       | Nanning, Guangxi     |
| S8         | Ganzhou, Jiangxi  | S18       | Chongqing            |
| S9         | Nanchang, Jiangxi | S19       | Anguo, Hebei         |
| S10        | Changsha, Hunan   | S20       | Ezhou, Hubei         |

**Table S2. Method validation data: precision, stability, repeatability.**

| Peak No. | Precision (n=6) |               | Stability (n=6) |               | Repeatability (n=6) |               |
|----------|-----------------|---------------|-----------------|---------------|---------------------|---------------|
|          | RSD of RT (%)   | RSD of PA (%) | RSD of RT (%)   | RSD of PA (%) | RSD of RT (%)       | RSD of PA (%) |
| 1        | 0.246           | 0.850         | 0.124           | 0.916         | 0.199               | 0.759         |
| 2        | 0.083           | 1.521         | 0.074           | 1.066         | 0.084               | 0.551         |
| 3        | 0.016           | 1.982         | 0.024           | 2.041         | 0.030               | 1.742         |
| 4        | 0.032           | 0.377         | 0.027           | 1.083         | 0.035               | 1.870         |
| 5        | 0.007           | 0.677         | 0.014           | 1.116         | 0.015               | 3.908         |
| 6        | 0.004           | 0.950         | 0.020           | 1.236         | 0.020               | 3.764         |
| 7        | 0.005           | 3.254         | 0.013           | 0.233         | 0.027               | 3.407         |
| 8        | 0.019           | 3.327         | 0.020           | 0.766         | 0.079               | 3.263         |
| 9        | 0.014           | 2.733         | 0.023           | 0.836         | 0.013               | 3.945         |
| 10       | 0.007           | 2.704         | 0.016           | 1.010         | 0.018               | 4.630         |
| 11       | 0.013           | 1.947         | 0.021           | 1.679         | 0.013               | 4.351         |
| 12       | 0.008           | 1.054         | 0.018           | 2.981         | 0.032               | 4.614         |
| 13       | 0.023           | 0.542         | 0.036           | 3.340         | 0.024               | 4.695         |
| 14       | 0.010           | 0.727         | 0.034           | 4.699         | 0.018               | 4.778         |
| 15       | 0.025           | 0.796         | 0.033           | 4.717         | 0.017               | 4.212         |
| 16       | 0.009           | 1.158         | 0.034           | 4.025         | 0.023               | 4.758         |
| 17       | 0.011           | 1.258         | 0.044           | 4.412         | 0.017               | 4.745         |
| 18       | 0.023           | 1.325         | 0.032           | 4.878         | 0.022               | 4.020         |

**Table S3. Similarity evaluation of precision test, stability test and repeatability test.**

| Precision test        | 1     | 2     | 3     | 4     | 5     | 6     | Reference fingerprint |
|-----------------------|-------|-------|-------|-------|-------|-------|-----------------------|
| 1                     | 1.000 | 0.972 | 0.926 | 0.989 | 0.968 | 0.983 | 0.989                 |
| 2                     | 0.972 | 1.000 | 0.972 | 0.969 | 0.985 | 0.974 | 0.993                 |
| 3                     | 0.926 | 0.972 | 1.000 | 0.931 | 0.938 | 0.954 | 0.967                 |
| 4                     | 0.989 | 0.969 | 0.931 | 1.000 | 0.956 | 0.982 | 0.987                 |
| 5                     | 0.968 | 0.985 | 0.938 | 0.956 | 1.000 | 0.954 | 0.982                 |
| 6                     | 0.983 | 0.974 | 0.954 | 0.982 | 0.954 | 1.000 | 0.990                 |
| Reference fingerprint | 0.989 | 0.993 | 0.967 | 0.987 | 0.982 | 0.990 | 1.000                 |
| Stability test        | 1     | 2     | 3     | 4     | 5     | 6     | Reference fingerprint |
| 1                     | 1.000 | 0.983 | 0.985 | 0.957 | 0.974 | 0.986 | 0.991                 |
| 2                     | 0.983 | 1.000 | 0.987 | 0.955 | 0.986 | 0.993 | 0.994                 |
| 3                     | 0.985 | 0.987 | 1.000 | 0.958 | 0.974 | 0.981 | 0.991                 |
| 4                     | 0.957 | 0.995 | 0.958 | 1.000 | 0.967 | 0.970 | 0.977                 |
| 5                     | 0.974 | 0.986 | 0.974 | 0.967 | 1.000 | 0.991 | 0.992                 |
| 6                     | 0.986 | 0.993 | 0.981 | 0.970 | 0.991 | 1.000 | 0.997                 |
| Reference fingerprint | 0.991 | 0.994 | 0.991 | 0.977 | 0.992 | 0.997 | 1.000                 |
| Repeatability test    | 1     | 2     | 3     | 4     | 5     | 6     | Reference fingerprint |
| 1                     | 1.000 | 0.960 | 0.908 | 0.896 | 0.910 | 0.964 | 0.980                 |
| 2                     | 0.960 | 1.000 | 0.850 | 0.872 | 0.848 | 0.994 | 0.959                 |
| 3                     | 0.908 | 0.850 | 1.000 | 0.896 | 0.988 | 0.842 | 0.955                 |
| 4                     | 0.896 | 0.872 | 0.896 | 1.000 | 0.895 | 0.873 | 0.944                 |
| 5                     | 0.910 | 0.848 | 0.998 | 0.895 | 1.000 | 0.844 | 0.955                 |
| 6                     | 0.94  | 0.994 | 0.842 | 0.873 | 0.844 | 1.000 | 0.958                 |
| Reference fingerprint | 0.980 | 0.959 | 0.955 | 0.944 | 0.955 | 0.958 | 1.000                 |

**Table S4. The similarities of Asparagi Radix from different batches.**

| Sample No. | Similarity | Sample No. | Similarity |
|------------|------------|------------|------------|
| S1         | 0.733      | S11        | 0.813      |
| S2         | 0.940      | S12        | 0.925      |
| S3         | 0.969      | S13        | 0.928      |
| S4         | 0.940      | S14        | 0.813      |
| S5         | 0.969      | S15        | 0.837      |
| S6         | 0.930      | S16        | 0.960      |
| S7         | 0.984      | S17        | 0.995      |
| S8         | 0.981      | S18        | 0.913      |
| S9         | 0.978      | S19        | 0.983      |
| S10        | 0.979      | S20        | 0.983      |

**Table S5. Eigenvalue and variance contribution rate of three main component factors.**

|     | Eigenvalue | Percentage of Variance (%) | Cumulative (%) |
|-----|------------|----------------------------|----------------|
| PC1 | 8.688      | 48.269                     | 48.269         |
| PC2 | 6.166      | 34.255                     | 82.524         |
| PC3 | 1.563      | 8.682                      | 91.206         |

**Table S6. Loadings of three principal component factors.**

| Peak No. | Score of PC1 | Score of PC2 | Score of PC3 |
|----------|--------------|--------------|--------------|
| 1        | -2.40638     | -2.02306     | 2.36401      |
| 2        | -4.43693     | -0.42716     | 2.11400      |
| 3        | -5.74931     | 1.49778      | 0.97175      |
| 4        | -5.91597     | 2.77622      | 0.25125      |
| 5        | -5.11347     | 2.94140      | -0.08369     |
| 6        | -5.04143     | 3.30692      | 0.47276      |
| 7        | -4.29186     | 4.21033      | -0.18952     |
| 8        | -3.46337     | 4.67543      | -0.26659     |
| 9        | -1.70097     | 5.47911      | -0.18944     |
| 10       | 0.45089      | 5.58178      | -0.14695     |
| 11       | 2.82241      | 4.84210      | 0.07483      |
| 12       | 4.09941      | 4.52194      | 0.13808      |
| 13       | 5.21291      | 3.74843      | 0.35271      |
| 14       | 5.93734      | 2.86956      | 0.54230      |
| 15       | 6.44892      | 1.91407      | 0.64679      |
| 16       | 6.65567      | 1.10405      | 0.67453      |
| 17       | 6.65800      | 0.45176      | 0.66899      |
| 18       | 6.51737      | -0.06614     | 0.48394      |

**Table S7. Scores of three principal component factors.**

| Sample No. | Score of PC1 | Score of PC2 | Score of PC3 |
|------------|--------------|--------------|--------------|
| S1         | -1.98908     | -5.58178     | -0.10784     |
| S2         | -0.50510     | -2.62799     | 0.37208      |
| S3         | -0.83796     | -1.10223     | -0.98648     |
| S4         | -1.97857     | -1.8676      | -1.32539     |
| S5         | -1.58307     | -0.11836     | 2.36401      |
| S6         | 2.85206      | 3.80159      | -0.37817     |
| S7         | 0.53024      | 0.34670      | 1.68751      |
| S8         | 2.94687      | 4.07526      | 2.12938      |
| S9         | -0.14242     | 0.82057      | -0.47822     |
| S10        | -0.46916     | 3.23603      | -0.09876     |
| S11        | 3.35429      | -1.66584     | -1.47932     |
| S12        | -3.83931     | 1.02353      | -0.74628     |
| S13        | 4.61327      | -2.59128     | -0.48261     |
| S14        | 2.41966      | -1.69342     | 1.22619      |
| S15        | 6.65800      | -1.38776     | -0.01741     |
| S16        | -1.92181     | 2.83458      | -1.59688     |
| S17        | -1.42082     | 1.49828      | -0.50314     |
| S18        | -5.21163     | -1.61433     | 2.15512      |
| S19        | -1.98908     | -5.58178     | -0.10784     |
| S20        | -0.50510     | -2.62799     | 0.37208      |



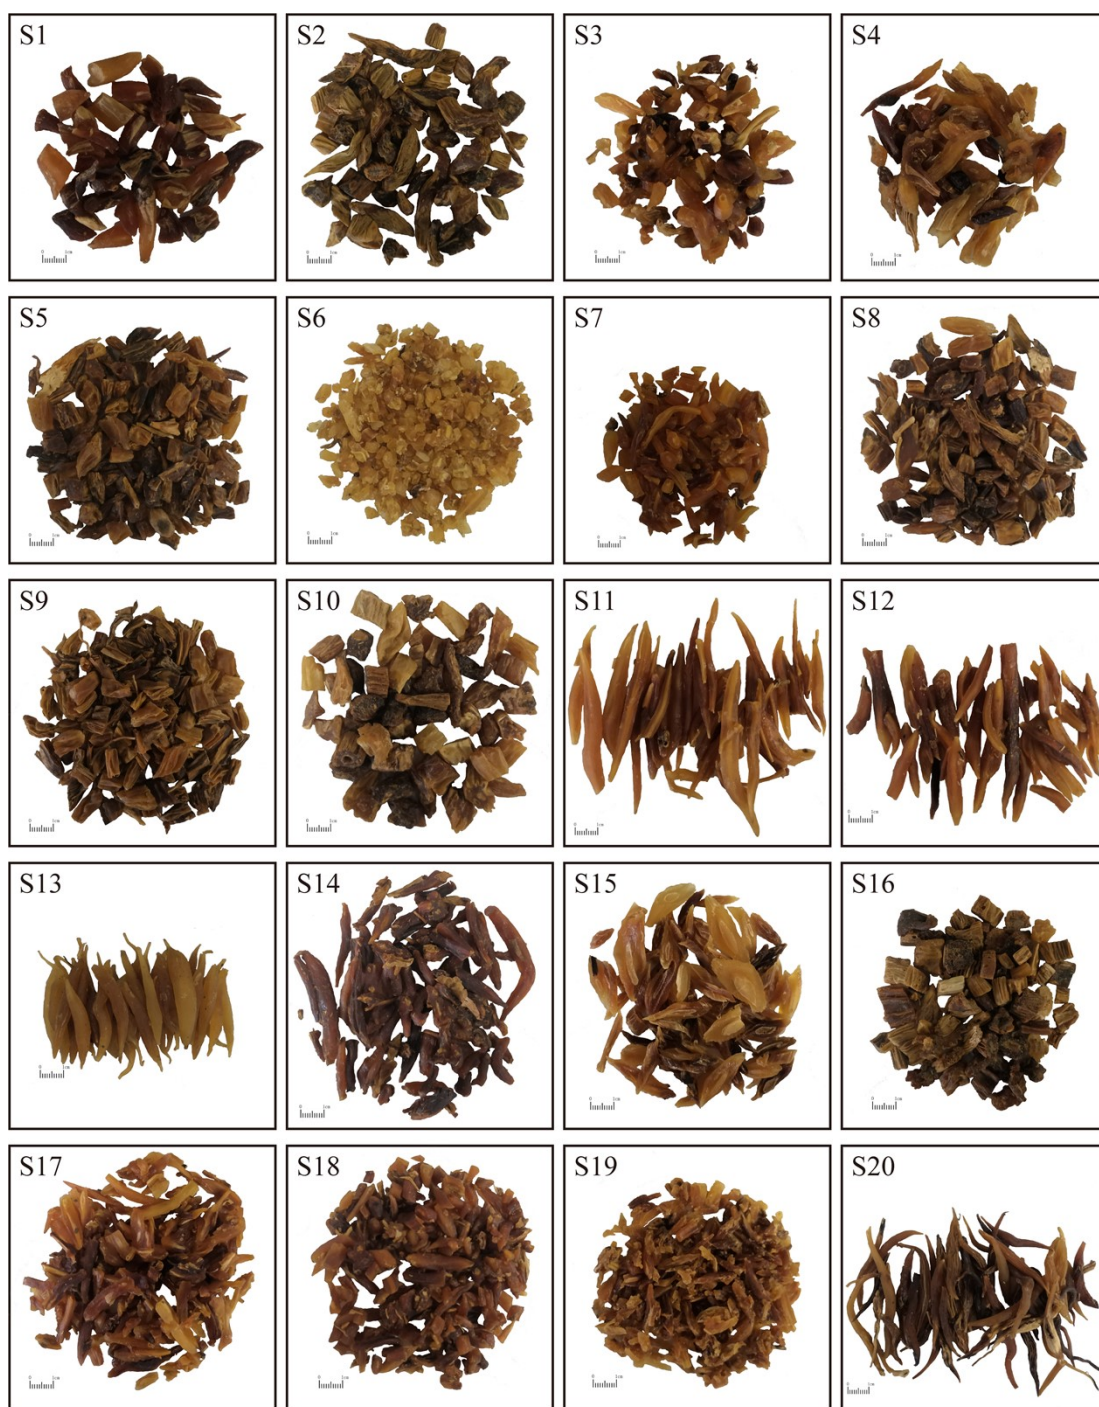

**Fig.S1. Twenty batches of Asparagi Radix raw material samples (S1–S20).**

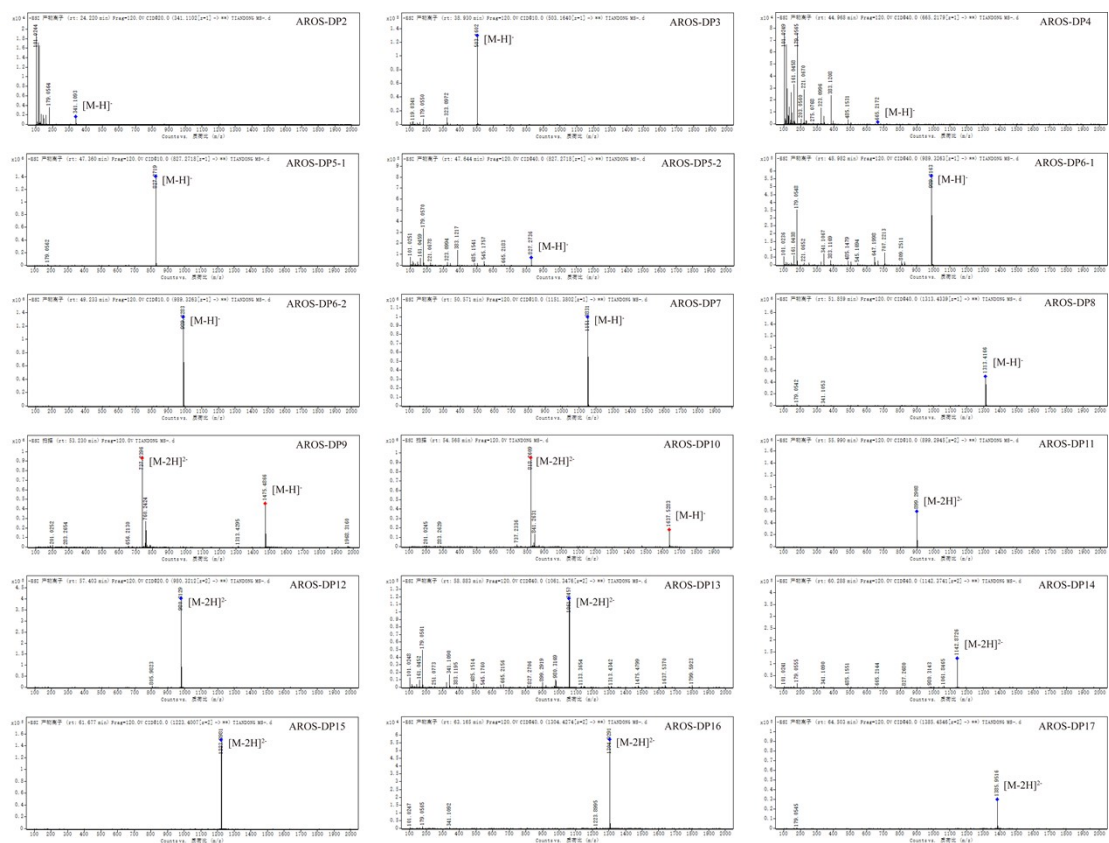

**Fig.S2. HPLC-QTOF-MS analysis of AROS.**

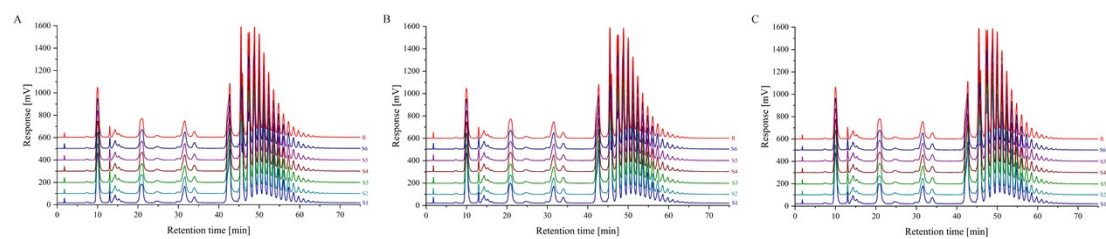

**Fig.S3. Method validation of HPLC-ELSD chromatogram analysis.** HPLC-ELSD chromatograms of precision test (A), stability test (B), and repeatability test (C).

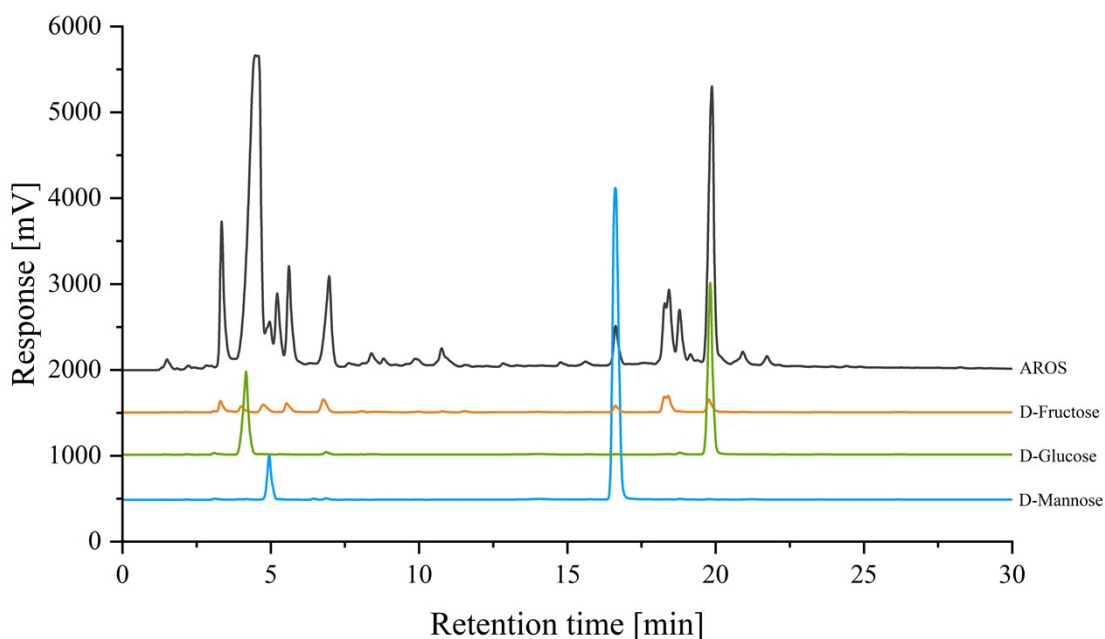

**Fig.S4. Chromatogram of PMP derivatives of trifluoroacetic acid hydrolysates of AROS.**

In this study, the monosaccharide composition in AROS was determined by HPLC using pre-column derivatization with PMP. The chromatography was analyzed using an Agilent 1260 Infinity II LC system (California, United States) equipped with an Agilent ZORBAX Extend-C18 column ( $4.6 \times 150$  mm,  $5 \mu\text{m}$ ) with a flow rate of  $1.0 \text{ mL/min}$ . The mobile phase was composed of  $20 \text{ mM}$  ammonium acetate in deionized water as phase A and acetonitrile as phase B. The column temperature was set at  $30^\circ\text{C}$ . The gradient elution program was set as follows:  $0\text{--}30 \text{ min}$ ,  $5\% \text{ B} - 95\% \text{ B}$ . The DAD detector was set at  $254 \text{ nm}$ .

Oligosaccharide samples were mixed with  $2.5 \text{ mL}$  trifluoroacetic acid (TFA) solution ( $2 \text{ M}$ ) and hydrolyzed for  $4 \text{ h}$  at  $80^\circ\text{C}$  in an oven. Then, the mixed solution was cooled to room temperature, a small amount of methanol was added several times, and dried at  $55^\circ\text{C}$  to remove excess TFA. The resulting monosaccharides were dissolved in deionized water.

Then,  $400 \mu\text{L}$  of hydrolysis was mixed with an isometric ammonia solution and PMP-methanol ( $0.5 \text{ M}$ ) solution. The mixture was incubated at  $70^\circ\text{C}$  for  $2 \text{ h}$  in a water bath, cooled to room temperature and neutralized with  $400 \mu\text{L}$  of glacial acetic acid. Chloroform was added and mixed vigorously, and the chloroform layer was carefully removed. The extraction process was repeated three times to remove the PMP residues. Finally, the aqueous layer was filtered through a  $0.22 \mu\text{m}$  filter before further analysis.
